# Supplementary material for: VarDict: a novel and versatile variant caller for next-generation sequencing in cancer research
Source: PubMed Central journal article supplement — Nucleic Acids Res. 2016 Apr 7;44(11):e108. doi: 10.1093/nar/gkw227 (PMC4914105; doi:10.1093/nar/gkw227), 2016-04-07
Supplement: supp_gkw227_nar-03544-met-k-2015-File002.pdf [file supp_gkw227_nar-03544-met-k-2015-File002.pdf]

## Supplemental information:

### VarDict: A novel and versatile variant caller for next-generation sequencing in cancer research

Zhongwu Lai<sup>1,\*</sup>, Aleksandra Markovets<sup>1</sup>, Miika Ahdesmaki<sup>2</sup>, Brad Chapman<sup>3</sup>, Oliver Hofmann<sup>3,4</sup>, Robert McEwen<sup>2</sup>, Justin Johnson<sup>1</sup>, Brian Dougherty<sup>1</sup>, J. Carl Barrett<sup>1</sup>, and Jonathan Dry<sup>1</sup>

<sup>1</sup>Oncology iMed, AstraZeneca, Waltham, MA 02451, USA

<sup>2</sup>Oncology iMed, AstraZeneca, Cambridge, United Kingdom

<sup>3</sup>Bioinformatics Core, Harvard T.H. Chan School of Public Health, Boston, MA 02115

<sup>4</sup>Wolfson Wohl Cancer Research Centre, Institute of Cancer Sciences, University of Glasgow, Bearsden Glasgow, G61 1QH, UK

\* To whom correspondence should be addressed. Tel: 781-839-4495; Fax: 781-839-4200; Email: Zhongwu.Lai@astrazeneca.com

#### METHODS

##### Detecting strand bias

Strand bias is a common source of artifact in NGS, resulting in false positive calls. To detect strand bias, VarDict uses Fisher Exact test. Forward and reverse oriented reads supporting reference and variant are counted to construct the 2x2 contingency table. If the resulting p-value is less than 0.01, it's considered strand bias and filtered out.

##### Detecting somatic mutations and LOH variants

VarDict also uses Fisher Exact test to call somatic mutations LOH (Loss of Heterozygosity) variants. Reads supporting reference and variant in the paired samples are counted to construct the 2x2 contingency table. If the resulting p-value is less than 0.05, it's considered significant change. The variant will be classified as somatic if it's not detectable in parental sample, or as LOH otherwise.

##### Features calculated by VarDict

VarDict calculates many features for the variants called and provides great flexibility for user to adjust different parameters through command line options, accommodating different sequencing situations. Suppl. Table 4 list features VarDict calculates and the corresponding command line to control them, if available.

##### Synthesize of complex variants

To synthesize the complex variants to test VarDict's capability, we synthesized 1,122 complex variants for coding exons of common cancer genes (highlighted in bold in Suppl. Table 2). We first extract coding exon sequences with 300bp flanking at each side. We then randomly deleted 1-50bp, followed by insertion of 1-50bp of different sequences. ART was then used to simulate 2x100bp Illumina HiSeq2500 pair end reads, with mean insert sizes of 350bp and standard deviation of 75bp. The reads were aligned to hg19 using BWA MEM and variants were called from the resulting BAM files. Suppl. Table 6 list such 1,122 variants.

#### RESULTS

##### Timing and resource usage comparisons

We compared the timing and resource usage among VarDict, MuTect, FreeBayes, and VarScan, using DREAM challenge synthetic dataset #4, which is a single tumor/normal WGS pair (60x coverage). We used a server of 64 cores, with 3Gb memory/core and NFS file system. Supp. Table 5 showed the run time. VarDict runs as fast as MuTect, and FreeBayes, and much faster than VarScan.

## SUPPLEMENTARY FIGURES

**Suppl. Figure 1. IGV screenshots for five EGFR InDel mutations (3 exon 19 deletions, 2 exon 20 insertions) missed by Firehose in TCGA LUAD cohort of 230 patients. A) TCGA-71-6725 is a complex mutation in exon 19 (c.2239\_2251delTTAAGAGAAGCAinsC), resulting in in-frame deletion of 4 aa and insertion of 1aa (L747\_T751delinsP); B) TCGA-05-4425 is a complex mutation in exon 19 (c.2237\_2255delAATTAAGAGAAGCAATCinsT), resulting in in-frame deletion of 5 aa and insertion of 1 aa (E746\_S752delinsV); C) TCGA-50-5935 is a deletion (c.2236\_2250delGAATTAAGAGAAGCA), resulting in in-frame deletion of 5 aa (E746\_A750del); D) TCGA-44-5645 is an insertion in exon 20 (c.2300\_2308dupCCAGCGTGG), resulting in in-frame insertion of 3 aa (A767\_V769dup); E) TCGA-55-6979 is an insertion in exon 20 (c.2314\_2319dupCCCCAC), resulting in in-frame insertion of 2 aa (P772\_H773dup). Only portion of representative reads were shown.**

**A) TCGA-71-6725**

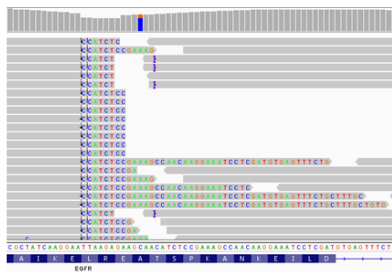

**B) TCGA-05-4425**

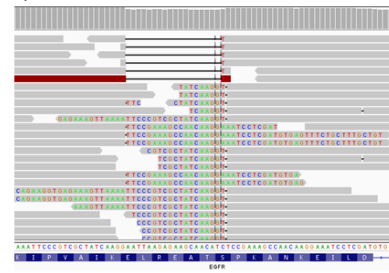

**C) TCGA-50-5935**

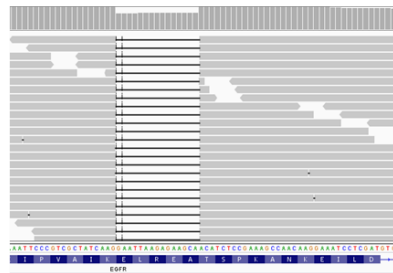

**D) TCGA-44-5645**

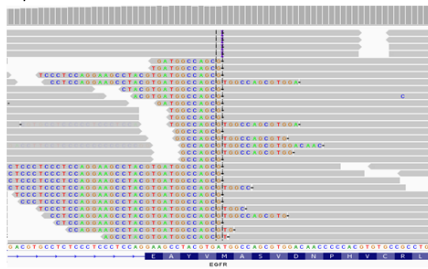

**E) TCGA-55-6979**

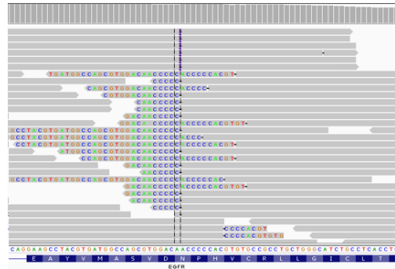

**Suppl. Figure 2. No evidence of MET exon 14 skipping in sample TCGA-55-6986-01 in TCGA LUAD cohort.** The figure shows the exon coverage from RNA-Seq for two samples. The middle one is the exon 14 of MET. The top sample (TCGA-55-6978-01) is a positive sample having exon 14 skipping due to splice site mutation (c.3082+1G>C), showing much lower coverage of exon 14 comparing to exon 13 and 15 due to skipping. The bottom sample TCGA-55-6986-01 showed no difference in coverage for exon 13, 14, and 15. No DNA mutation in MET was detected in this patient.

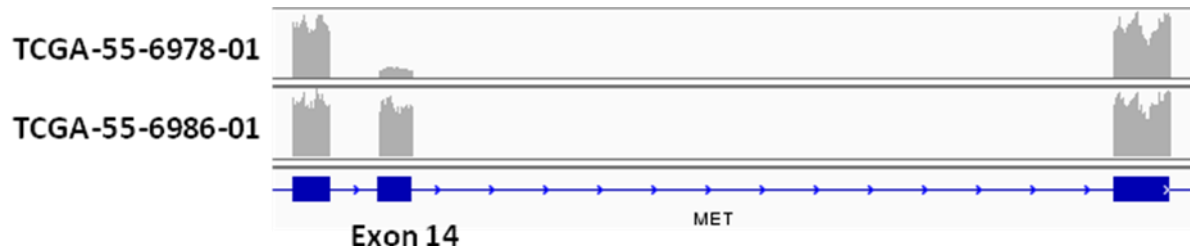

**Suppl. Figure 3. The comparison of VarDict and Firehose calls for TP53 and STK11 in 230 TCGA LUAD patients.** Each column represents a patient. Each gene has two rows, with top one showing calls from VarDict and bottom one calls from Firehose. Different colours indicate different mutation types. VarDict called TP53 mutations in 57% patients, compared to 46.1% in Firehose; and VarDict called STK11 mutations in 27.4% patients, compared to 17.4% in Firehose. Most of additional STK11 mutations called are truncations and splice sites, consistent with STK11's function as a tumor suppressor. VarDict called all mutations called in Firehose, except for TP53 P77L mutation in TCGA-49-4487-01, which was called by VarDict but filtered out because the allele frequency was < 7.5% and the function is unknown. However, VarDict called on frameshift InDel TP53 mutation H178fs in TCGA-49-4487-01 that was not called in Firehose, suggesting TP53 P77L was likely just a passenger mutation. The sample is marked green for TP53 by Firehose but purple by VarDict. Again, VarDict calls more mutations in both SNV and InDels. Trunc: Truncation; FS: Frameshift.

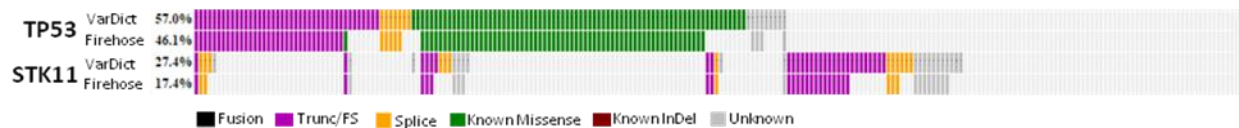

**Suppl. Figure 4. Linear performance of VarDict relative to depth.** The graph showed the run time of VarDict against the depth of coverage. X-axis is the depth of coverage with highest over 500k, and y-axis the running time for VarDict in seconds. The data was simulated using VarDict's `-Z` option, which controls the amount of downsampling in a random fashion.

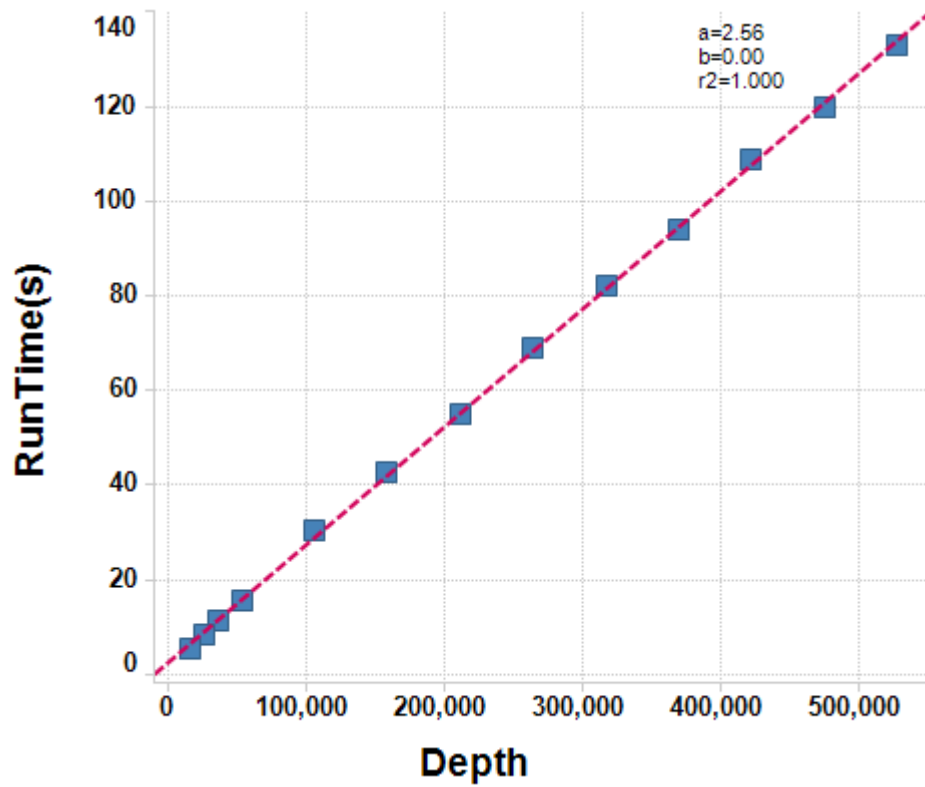

**Suppl. Figure 5. Histogram of allele frequencies of somatic mutations called by VarDict.** The histogram showed near identical distribution of allele frequencies for SNV, Insertion and Deletion, suggesting VarDict has accurate estimation of allele frequencies for Insertions and Deletions, as SNV estimation is relatively accurate.

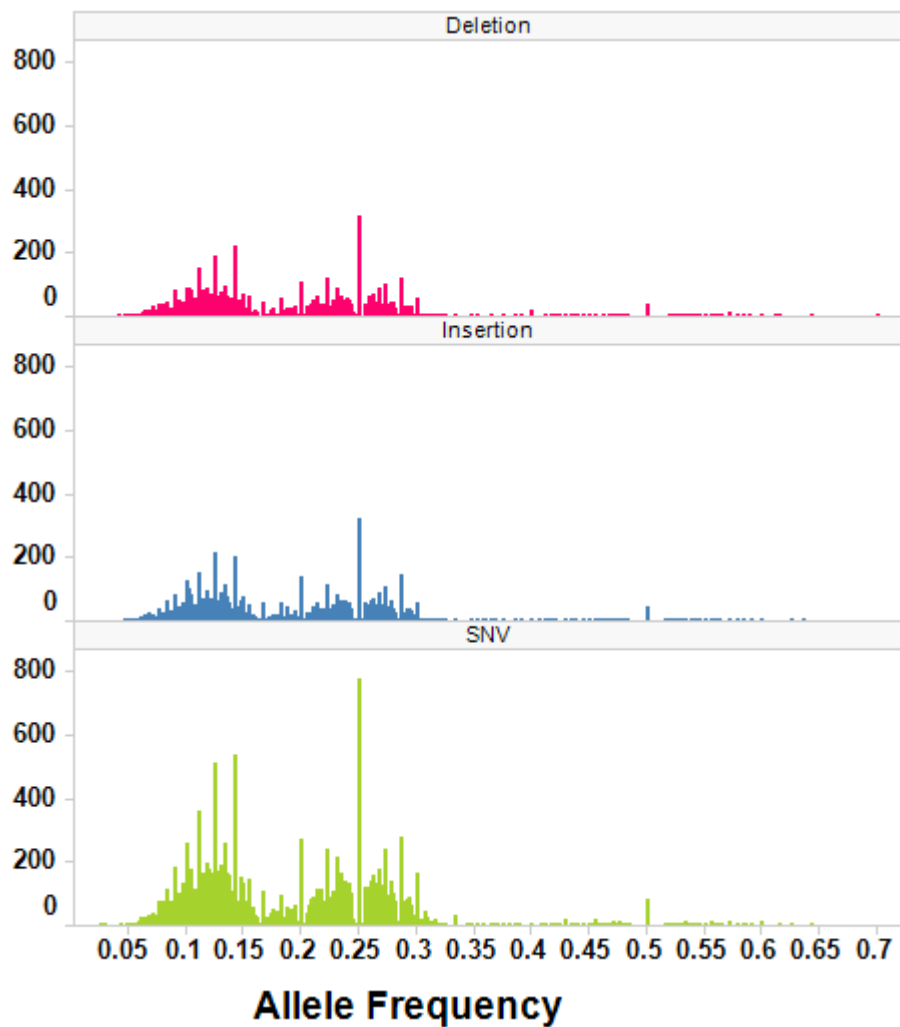

**Suppl. Figure 6. CPU usage comparison of VarDict, FreeBayes, MuTect, and VarScan for DREAM Challenge synthetic dataset #4.**

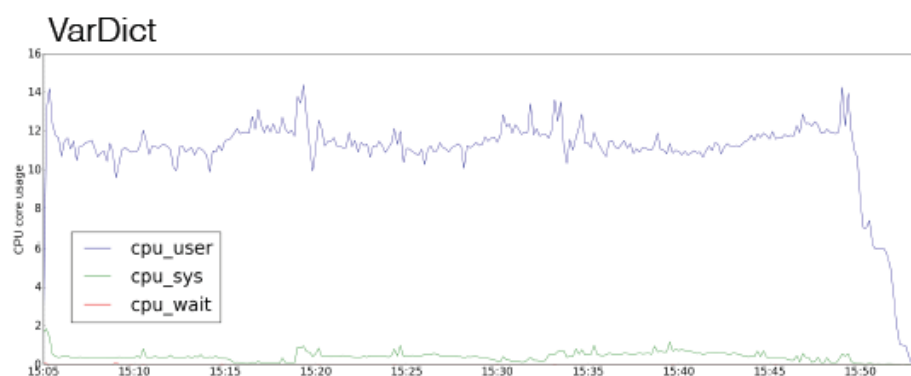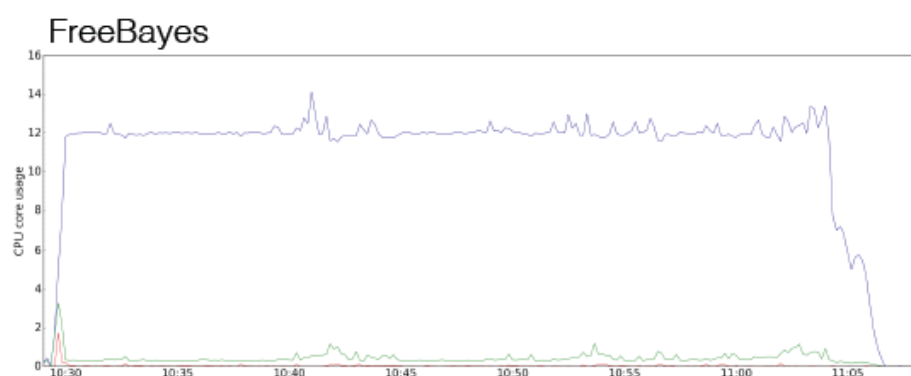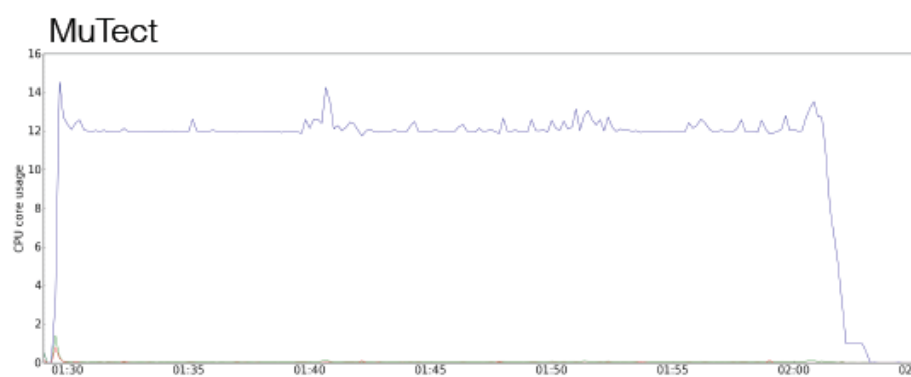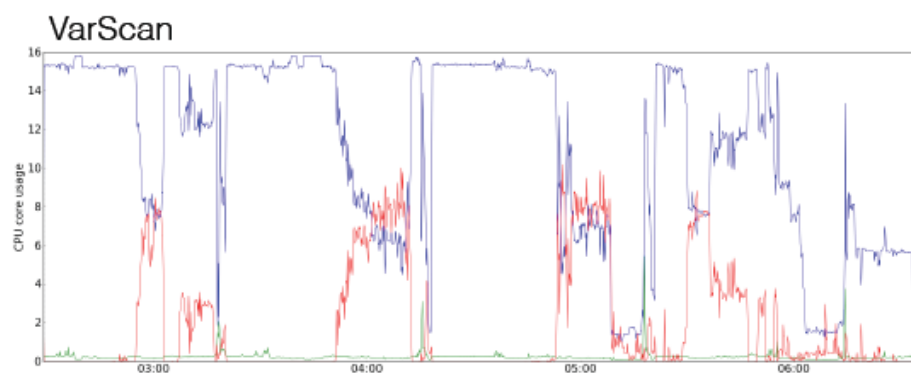

Call start

Call finish



**Suppl. Figure 7. Memory usage comparison of VarDict, FreeBayes, MuTect, and VarScan for DREAM Challenge synthetic dataset #4.**

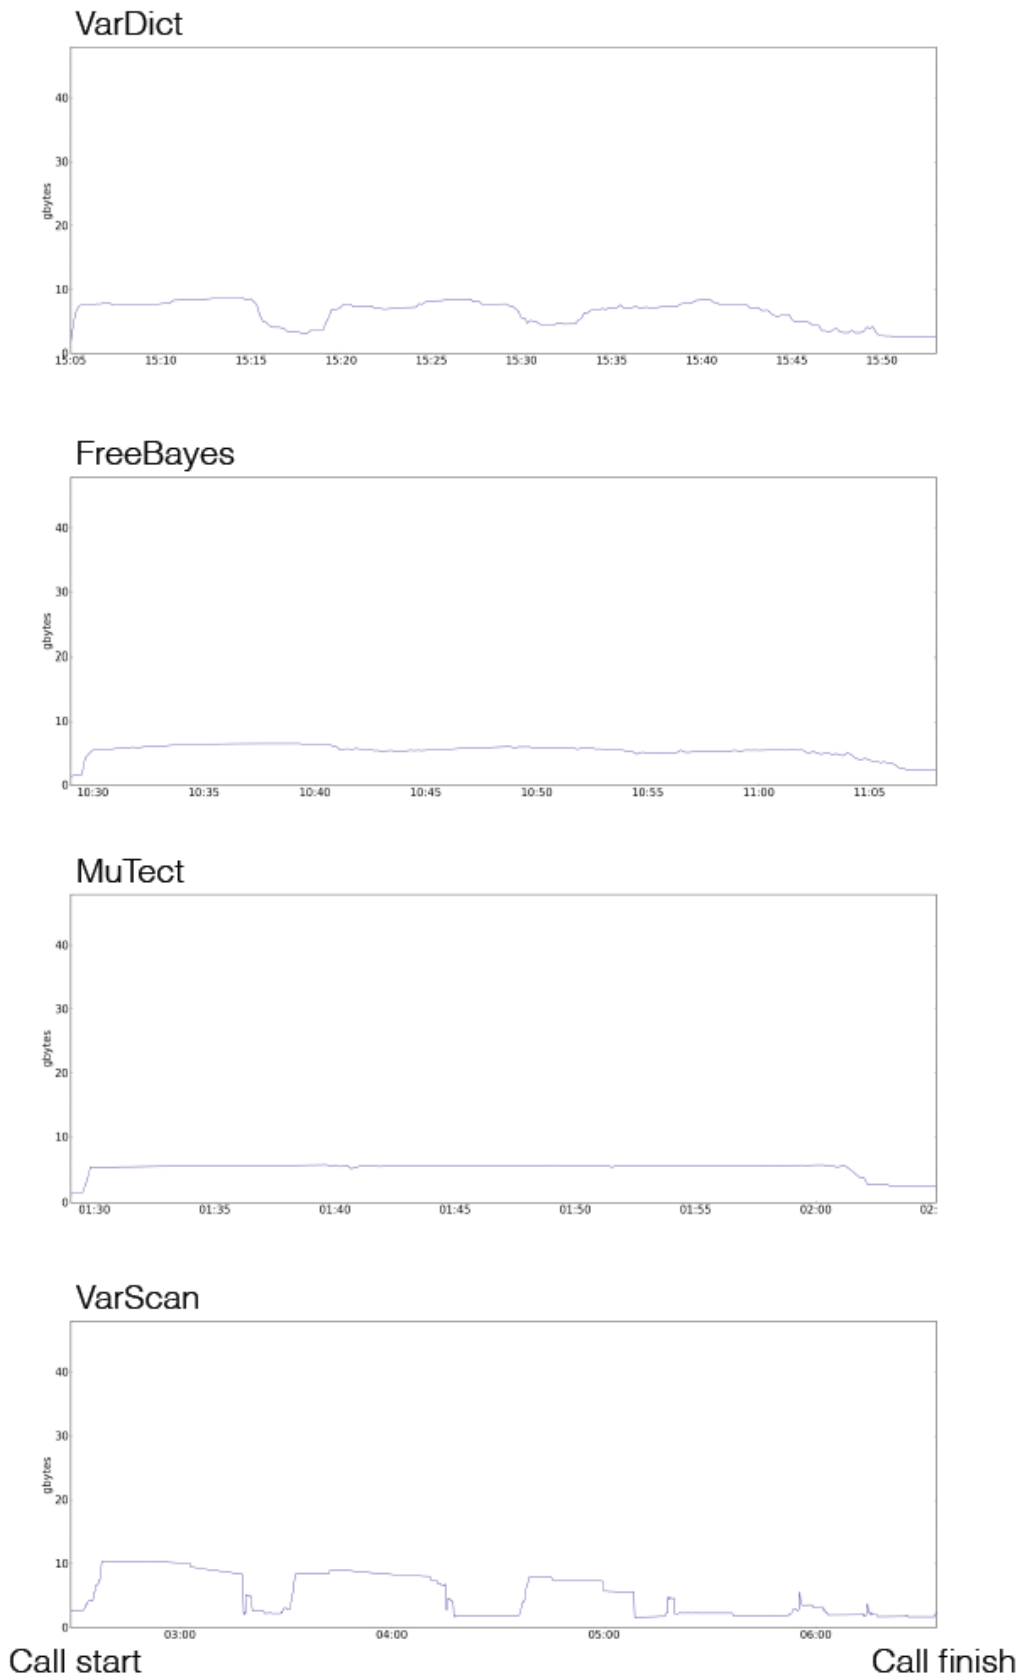

**Suppl. Figure 8. Network (shared filesystem read/writes) usage comparison of VarDict, FreeBayes, MuTect, and VarScan for DREAM Challenge synthetic dataset #4.**

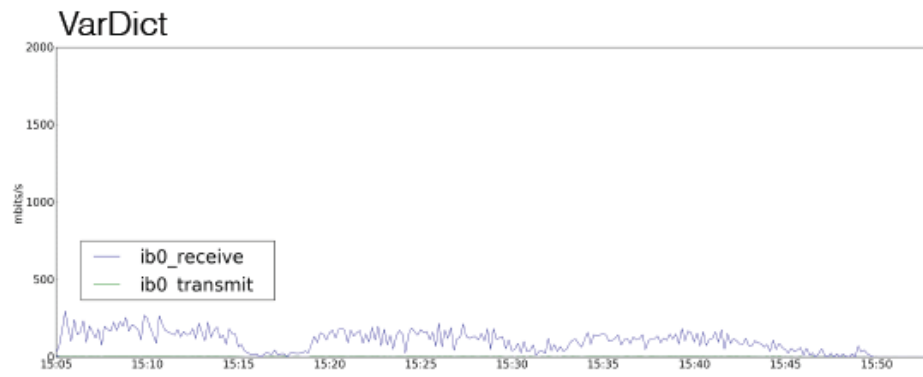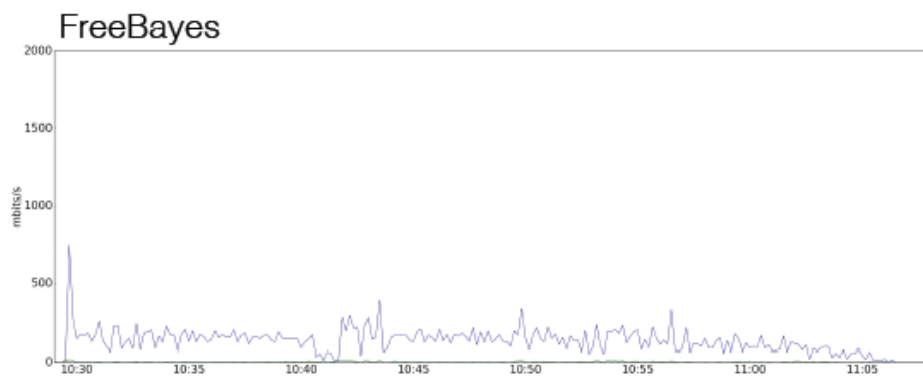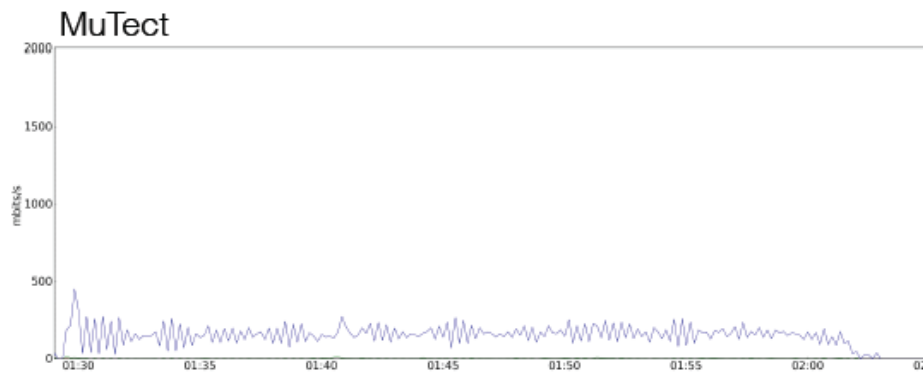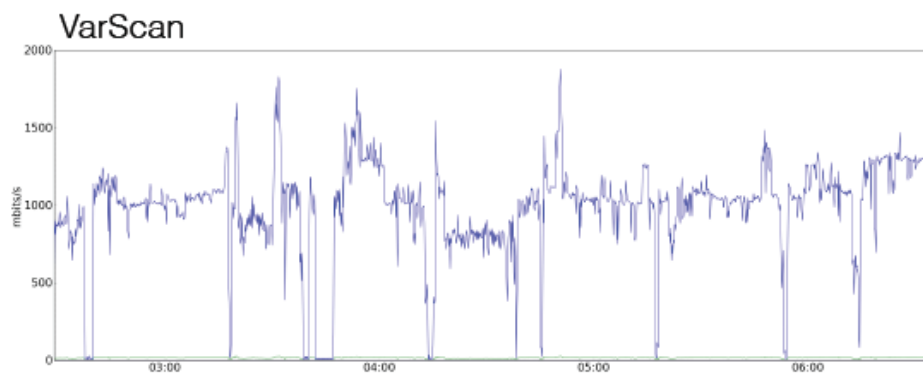

Call start

Call finish

**Suppl. Table 1. Comparison of complex variant calling for VarDict, Pindel, and Scalpel.** The synthetic dataset contains 1,122 complex variants. Each complex variant is random deletion of 1-50bp within or near every coding exons of common cancer genes (highlighted in bold in Suppl. Table 2), inserted randomly with 1-50bp of different sequences. Pair end Illumina reads were simulated using ART (17) at 50x coverage and aligned to hg19 using BWA MEM. TP overlap: true positives that overlap with key; FP: false positives; TP exact: true positives match exactly with keys.

| <b>Caller</b> | <b>TP Overlap</b> | <b>FP</b> | <b>TP exact</b> |
|---------------|-------------------|-----------|-----------------|
| VarDict       | 1,113 (99%)       | 16        | 1,073           |
| Pindel        | 882 (78%)         | 186       | 63              |
| Scalpel       | 1,052 (94%)       | 454       | 0               |

**Suppl. Table 2: List of 208 genes analyzed by VarDict for 230 TCGA lung adenocarcinoma patients.**

|              |               |              |               |             |               |              |
|--------------|---------------|--------------|---------------|-------------|---------------|--------------|
| ABL1         | CCND2         | FANCB        | <b>GNA11</b>  | MDM4        | PARP3         | RAD54L       |
| AGTR2        | CCND3         | FANCC        | <b>GNAQ</b>   | MECOM       | PARP4         | <b>RAF1</b>  |
| AKT1         | <b>CCNE1</b>  | FANCD2       | <b>GNAS</b>   | MED12       | PBRM1         | <b>RB1</b>   |
| <b>AKT2</b>  | CD79A         | FANCE        | HGF           | <b>MET</b>  | <b>PDGFRA</b> | <b>RET</b>   |
| <b>AKT3</b>  | CD79B         | FANCF        | <b>HRAS</b>   | MLH1        | PIK3C2B       | <b>ROS1</b>  |
| <b>ALK</b>   | <b>CDH1</b>   | FANCG        | IDH1          | MLL2        | PIK3C2G       | RPA1         |
| APC          | CDK12         | FANCI        | IDH2          | MRAS        | PIK3C3        | RPTOR        |
| <b>AR</b>    | CDK4          | FANCL        | IGF1R         | MRE11A      | <b>PIK3CA</b> | RUNX1        |
| <b>ARAF</b>  | CDK6          | FANCM        | IL6           | MSH2        | <b>PIK3CB</b> | SMARCA4      |
| ARID1A       | CDK9          | FBXW7        | IRAK4         | MSH3        | PIK3CD        | SMARCB1      |
| ARID2        | <b>CDKN2A</b> | FGF1         | JAK1          | MSH6        | PIK3CG        | SOS1         |
| ASXL1        | <b>CHEK1</b>  | FGF10        | JAK2          | <b>MTOR</b> | PIK3R1        | SOX2         |
| <b>ATM</b>   | <b>CHEK2</b>  | FGF12        | JAK3          | MUTYH       | PIK3R2        | SPOP         |
| ATR          | <b>CTNNB1</b> | FGF14        | KDM5C         | <b>MYC</b>  | PIM1          | <b>STK11</b> |
| ATRX         | CUL4A         | FGF19        | KDM6A         | MYCL1       | PIM2          | TERT         |
| AXIN2        | DDR2          | FGF2         | KDR           | MYCN        | PIM3          | TET2         |
| BACH1        | <b>EGFR</b>   | FGF23        | KEAP1         | MYD88       | PMS1          | TGFBR2       |
| <b>BAP1</b>  | EML4          | FGF3         | <b>KIT</b>    | MYT1        | PMS2          | TIPARP       |
| BARD1        | EP300         | FGF4         | <b>KRAS</b>   | NBN         | POLE          | TMPRSS2      |
| BCL2L1       | ERAS          | FGF5         | <b>MAP2K1</b> | <b>NF1</b>  | PPP2R1A       | <b>TP53</b>  |
| BLM          | <b>ERBB2</b>  | FGF6         | <b>MAP2K2</b> | NF2         | PPP2R2A       | TP53BP1      |
| <b>BRAF</b>  | ERBB3         | FGF7         | <b>MAP2K4</b> | NFE2L2      | PRKDC         | <b>TSC1</b>  |
| <b>BRCA1</b> | ERBB4         | FGF8         | <b>MAP3K1</b> | NFE2L3      | <b>PTEN</b>   | <b>TSC2</b>  |
| <b>BRCA2</b> | ERCC1         | FGF9         | MAP3K13       | NPM1        | PTENP1        | <b>VHL</b>   |
| <b>BRD4</b>  | ERCC2         | <b>FGFR1</b> | MAP3K8        | <b>NRAS</b> | RAD50         | WEE1         |
| <b>BRIP1</b> | ERG           | <b>FGFR2</b> | <b>MAPK1</b>  | NSD1        | RAD51         | XRCC1        |
| C11orf30     | <b>ESR1</b>   | <b>FGFR3</b> | <b>MAPK3</b>  | PAK1        | RAD51B        | XRCC2        |
| C19orf40     | EZH2          | FGFR4        | MCL1          | PALB2       | RAD51C        | XRCC3        |
| CCNB1        | FAM175A       | <b>FLT3</b>  | MCPH1         | PARP1       | RAD51D        |              |
| <b>CCND1</b> | FANCA         | <b>GATA3</b> | <b>MDM2</b>   | PARP2       | RAD52         |              |

**Suppl. Table 3: List of mutations called by VarDict in 230 TCGA lung adenocarcinoma patients for 208 genes.** Only mutations affecting coding regions are listed. Synonymous mutations are filtered, unless they are known in literature to be functionally impactful, such as TP53 T125T. The last part of the Sample name indicates the sequencing platform: WGS (whole genome sequencing), WXS (exome), or VALIDATION. The last column indicates the status of variants: “known” means it’s known to have a functional impact; “likely” means the variant is likely to have a functional impact on the gene; and “unknown” means the functional impact is unknown.

**Suppl. Table 4: List of features VarDict calculates and corresponding command line option to control them, if available.** The values in the 3<sup>rd</sup> column are default. AF: Allele fraction; DUP: Large duplication; DEL: Large deletion; INV: Large inversion; INS: Large insertion; BND: Fusion; LOH: Loss of Heterozygosity; NA: not available.

| Feature   | Description                                                                                                                   | Command Line (Default)           |
|-----------|-------------------------------------------------------------------------------------------------------------------------------|----------------------------------|
| TYPE      | Variant type. Possible values are: SNV, Insertion, Deletion, Complex, DUP, DEL, INV, INS, BND                                 | NA                               |
| END       | The end position for the variant                                                                                              | NA                               |
| DP        | The total depth of coverage                                                                                                   | NA                               |
| VD        | Minimum number of reads supporting alternative                                                                                | -r 2                             |
| RD        | The reference forward and reverse read counts                                                                                 | NA                               |
| ALD       | The variant forward and reverse read counts                                                                                   | NA                               |
| AF        | Minimum allele fraction                                                                                                       | -f 0.05                          |
| PMEAN     | Mean base position in the reads                                                                                               | -p 8                             |
| PSTD      | Indicate whether base position changes in different reads. 0 means no change and indicate of potential duplicates.            | NA                               |
| QUAL      | Mean base quality for the variant                                                                                             | -q 25                            |
| BIAS      | Strand bias information                                                                                                       | -B 2                             |
| REFBIAS   | Reference depth by strand                                                                                                     | NA                               |
| VARBIAS   | Variant depth by strand                                                                                                       | NA                               |
| SBF       | The p-value for strand bias from Fisher Exact                                                                                 | NA                               |
| ODDRATIO  | Strand bias odd ratio                                                                                                         | NA                               |
| MQ        | Mean mapping quality                                                                                                          | -O 0                             |
| SN        | Signal to noise. The ratio of high quality bases/low quality bases                                                            | -o 1.5                           |
| HIAF      | AF using only high quality bases                                                                                              | NA                               |
| ADJAF     | Additional AF for InDels from local realignment                                                                               | NA                               |
| SHIFT3    | No. of bases for InDels that can be shifted to 3' but still produce equivalent alignment                                      | NA                               |
| NM        | Mean mismatches in reads supporting variant                                                                                   | -m 4.25                          |
| MSI       | No. of microsatellite repeats (>1 indicate MSI)                                                                               | NA                               |
| MSILEN    | The unit length of MSI                                                                                                        | NA                               |
| DUPRATE   | The duplication rate surrounding variant                                                                                      | NA                               |
| SPLITREAD | No. of split reads supporting structural variant                                                                              | NA                               |
| SPANPAIR  | No. of discordant pairs supporting structural variant                                                                         | NA                               |
| LSEQ      | 20 bp flanking sequence at 5'                                                                                                 | NA                               |
| RSEQ      | 20 bp flanking sequence at 3'                                                                                                 | NA                               |
| SSF       | Somatic p-value from Fisher Exact (paired mode only)                                                                          | -p 0.05 (in VCF conversion step) |
| SOR       | Odd ratio from somatic testing (paired mode only)                                                                             | NA                               |
| STATUS    | Paired status. Values are: Germline, StrongSomatic, LikelySomatic, StrongLOH, LikelyLOH, Deletion, SampleSpecific, and AFDiff | NA                               |
| GDAMP     | No. of PCR amplicons supporting variant (Amplicon mode only)                                                                  | NA                               |
| TLAMP     | Total PCR amplicons covering variant (Amplicon mode only)                                                                     | NA                               |
| NCAMP     | No. of amplicons don't work (Amplicon mode only)                                                                              | NA                               |
| AMPFLAG   | Amplicon bias flag (Amplicon mode only)                                                                                       | NA                               |

**Suppl. Table 5: Run time comparison of various callers using DREAM challenge synthetic dataset #4.** We used a server of 64 cores, with 3Gb memory/core and NFS file system. MuTect run time is only for SNP and doesn't include InDel calling as MuTect doesn't call InDels.

| <b>Caller</b>    | <b>Time</b> |
|------------------|-------------|
| <b>MuTect</b>    | 36m         |
| <b>FreeBayes</b> | 39m         |
| <b>VarDict</b>   | 48m         |
| <b>VarScan</b>   | 4h18m       |

**Suppl. Table 6: 1,122 synthetic complex variants used in testing VarDict's complex variant calling capability.**
